# Supplementary material for: Investigations into Ti-15Mo-W Alloys Developed for Medical Applications
Source: PubMed Central journal article supplement (PMC6337162; doi:10.3390/ma12010147), 2019-01-04
Supplement: materials-12-00147-s001.pdf [file materials-12-00147-s001.pdf]

## Supplementary Material for: Investigations into Ti-15Mo-W Alloys Developed for Medical Applications

Mihai Buzatu, Victor Geantă, Radu Ștefănoiu, Mihai Buțu, Mircea-Ionuț Petrescu, Mihai Buzatu, Iulian Antoniac, Gheorghe Iacob, Florentina Niculescu, Ștefan-Ioan Ghica and Horațiu Moldovan

**Table 1.** The X-ray diffraction indexation sheet in Figure 3.

| Peak list |      |       |        |         |              |        |        |       |
|-----------|------|-------|--------|---------|--------------|--------|--------|-------|
| No.       | h    | k     | l      | d [Å]   | 2Theta (deg) | I (%)  |        |       |
| 1         | 1    | 1     | 0      | 2,31250 | 38,914       | 100,0  |        |       |
| 2         | 1    | 0     | 1      | 2,30700 | 39,011       | 100,0  |        |       |
| 3         | 2    | 0     | 1      | 1,63150 | 51,088       | 8,3    |        |       |
| 4         | 2    | 0     | 1      | 1,63200 | 56,328       | 75,0   |        |       |
| 5         | 0    | 0     | 2      | 1,40650 | 66,415       | 4,3    |        |       |
| 6         | 3    | 0     | 0      | 1,33900 | 70,238       | 75,0   |        |       |
| 7         | 2    | 1     | 1      | 1,33310 | 70,596       | 18,7   |        |       |
| 8         | 1    | 1     | 2      | 1,20400 | 79,551       | 80,0   |        |       |
| 9         | 2    | 2     | 0      | 1,16200 | 83,044       | 5,0    |        |       |
| 10        | 2    | 2     | 1      | 1,06940 | 92,160       | 0,8    |        |       |
| 11        | 3    | 1     | 1      | 1,03320 | 96,412       | 5,8    |        |       |
| 12        | 4    | 0     | 0      | 1,00130 | 100,582      | 0,1    |        |       |
| Structure |      |       |        |         |              |        |        |       |
| No.       | Name | Elem. | X      | Y       | Z            | Biso   | sof    | Wyck. |
| 1         | TI1  | Ti    | 0,0000 | 0,0000  | 0,0000       | 0,5000 | 1,0000 | 1a    |
| 2         | TI2  | Ti    | 0,3333 | 0,6666  | 0,5000       | 0,5000 | 1,0000 | 2d    |

**Table 2.** The X-ray diffraction indexation sheet in Figure 4.

| Peak list |      |       |        |         |              |        |        |       |
|-----------|------|-------|--------|---------|--------------|--------|--------|-------|
| No.       | h    | k     | l      | d [Å]   | 2Theta (deg) | I (%)  |        |       |
| 1         | 1    | 1     | 0      | 2,31650 | 38,845       | 100,0  |        |       |
| 2         | 2    | 0     | 0      | 1,63800 | 56,103       | 13,2   |        |       |
| 3         | 2    | 1     | 1      | 1,33740 | 70,335       | 20,9   |        |       |
| 4         | 2    | 2     | 0      | 1,15820 | 83,377       | 5,4    |        |       |
| 5         | 3    | 1     | 0      | 1,03600 | 96,066       | 6,7    |        |       |
| 6         | 2    | 2     | 2      | 0,94570 | 109,082      | 1,6    |        |       |
| 7         | 3    | 2     | 1      | 0,87550 | 123,246      | 8,3    |        |       |
| 8         | 4    | 0     | 0      | 0,81900 | 140,284      | 0,9    |        |       |
| Structure |      |       |        |         |              |        |        |       |
| No.       | Name | Elem. | X      | Y       | Z            | Biso   | sof    | Wyck. |
| 1         | TI1  | Ti    | 0,0000 | 0,0000  | 0,0000       | 0,5000 | 1,0000 | 2a    |

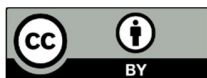

© 2019 by the authors. Licensee MDPI, Basel, Switzerland. This article is an open access article distributed under the terms and conditions of the Creative Commons Attribution (CC BY) license (<http://creativecommons.org/licenses/by/4.0/>).
